# Supplementary material for: Comparison of ultrasonic shear wave elastography, AngioPLUS planewave ultrasensitive imaging, and optimized high-resolution magnetic resonance imaging in evaluating carotid plaque stability
Source: PeerJ. 2023 Sep 27;11:e16150. doi: 10.7717/peerj.16150 (PMC10541810; doi:10.7717/peerj.16150)
Supplement: Supplemental Information 1 [file peerj-11-16150-s001.xlsx]

## Sheet: Vulnerable
Num	Gender	Age	BMI (kg/m2）	Smoking history	History of hypertension	History of hyperglycemia	History of hyperlipidemia	History of coronary heart disease	Plaque thickness (mm)	IMT (mm)	Surface characteristics	Calcified nodules	Low echo area	Degree of carotid stenosis
1	male	59	26.67	Yes	Yes	Yes	Yes	No	3.8	1.2	regular	no	no	moderate
2	female	57	26.88	Yes	No	No	Yes	No	3.7	1.6	regular	no	no	moderate
3	male	65	23.01	Yes	Yes	No	Yes	No	2.7	1.3	irregular	yes	no	moderate
4	female	64	25.02	Yes	Yes	Yes	No	Yes	3.4	0.6	regular	no	no	severe
5	male	55	26.6	Yes	Yes	No	No	No	2.9	1	irregular	no	yes	severe
6	male	57	29.34	No	Yes	Yes	Yes	Yes	3	1.6	regular	yes	yes	mild
7	male	61	22.66	Yes	No	No	Yes	Yes	2.9	1.3	irregular	no	yes	moderate
8	female	60	27.91	Yes	No	Yes	Yes	Yes	2.6	0.9	regular	no	yes	mild
9	female	61	27.04	Yes	No	No	No	Yes	2.7	1.1	irregular	no	yes	severe
10	male	65	25.21	No	Yes	Yes	Yes	Yes	3.1	1.5	regular	no	yes	mild
11	male	59	25.11	Yes	Yes	Yes	Yes	Yes	2.2	1	irregular	yes	no	severe
12	female	61	23.66	Yes	Yes	No	No	Yes	3.6	1.7	irregular	yes	yes	severe
13	male	63	28.35	Yes	Yes	No	Yes	Yes	3.2	1.1	irregular	no	no	severe
14	male	61	20.75	Yes	Yes	Yes	Yes	Yes	3.7	2.1	irregular	no	no	moderate
15	male	56	25.54	No	Yes	Yes	Yes	Yes	3.4	1	regular	no	no	severe
16	female	64	22.17	Yes	No	Yes	No	Yes	3.5	1.4	irregular	no	yes	moderate
17	male	62	27.21	Yes	Yes	Yes	No	No	2.3	0.8	regular	yes	yes	mild
18	male	59	28.77	Yes	Yes	No	Yes	Yes	2.6	1.1	irregular	yes	no	severe
19	male	54	32.35	Yes	Yes	Yes	Yes	Yes	2.9	1.1	irregular	no	yes	severe
20	male	62	23.75	Yes	No	Yes	Yes	Yes	3.3	1.5	regular	yes	no	moderate
21	male	49	25.3	Yes	Yes	No	Yes	No	3.9	1.7	regular	no	yes	severe
22	male	58	24.97	Yes	Yes	Yes	Yes	Yes	3	1.5	irregular	no	yes	severe
23	male	61	25.13	Yes	No	Yes	Yes	Yes	4	1.2	irregular	yes	yes	severe
24	male	61	27.68	Yes	Yes	Yes	No	Yes	3.5	1.7	irregular	no	yes	moderate
25	male	69	27.18	Yes	Yes	No	No	Yes	4	1.7	irregular	yes	yes	severe
26	female	65	28.09	Yes	Yes	Yes	Yes	Yes	3.3	1.4	irregular	no	no	severe
27	male	59	30.12	Yes	Yes	Yes	Yes	Yes	2.8	1.6	irregular	no	no	mild
28	female	60	28.54	No	Yes	No	Yes	Yes	2.3	1.5	regular	yes	yes	severe
29	female	60	24.66	Yes	Yes	Yes	Yes	No	3.3	1	regular	yes	yes	moderate
30	male	56	24.05	Yes	Yes	Yes	Yes	Yes	3.7	1.7	irregular	no	no	moderate
31	male	62	22.92	Yes	Yes	Yes	Yes	No	3	1.1	irregular	no	no	severe
32	male	63	25.17	Yes	Yes	No	No	Yes	2.9	1.1	regular	no	yes	severe
33	male	70	25.97	Yes	No	Yes	Yes	Yes	3	1.4	irregular	no	no	moderate
34	female	56	26.35	Yes	Yes	Yes	Yes	Yes	2.5	1.3	regular	no	yes	mild
35	female	59	22.47	Yes	Yes	Yes	Yes	Yes	2.9	1.3	regular	yes	no	mild
36	male	55	20.63	No	Yes	No	No	No	3.1	1.6	irregular	no	no	severe
37	male	66	25.18	Yes	Yes	Yes	Yes	Yes	3.3	1.8	irregular	no	yes	moderate
38	male	63	28.49	Yes	Yes	Yes	No	Yes	3.2	1.3	regular	yes	no	moderate
39	male	65	25.15	Yes	No	Yes	Yes	No	3.6	1.5	irregular	no	no	occlusive
40	female	57	25.43	Yes	Yes	No	No	Yes	3.3	1.3	irregular	yes	no	moderate
41	female	60	27.04	Yes	Yes	No	Yes	No	4.4	1.5	irregular	no	no	mild
42	female	64	26.73	Yes	Yes	Yes	No	Yes	3.4	1.5	irregular	yes	yes	severe
43	male	52	28.69	Yes	Yes	No	Yes	No	4.4	1.1	irregular	no	yes	severe
44	male	57	23.71	Yes	Yes	No	Yes	No	2.8	1.5	regular	yes	yes	occlusive
45	male	72	21.84	Yes	Yes	No	Yes	Yes	3.6	1.6	irregular	no	no	severe
46	male	61	25.79	Yes	Yes	No	Yes	No	3.1	1.4	regular	yes	yes	moderate
47	male	61	23.77	Yes	Yes	Yes	Yes	No	3.6	2	irregular	no	yes	moderate
48	female	62	19.92	Yes	Yes	No	Yes	Yes	3.6	1.1	irregular	no	yes	moderate
49	male	65	24.51	Yes	Yes	Yes	Yes	No	1.9	1.1	regular	no	yes	severe
50	male	62	22.47	Yes	No	Yes	No	Yes	2.4	0.7	irregular	yes	yes	severe
51	female	56	27.3	No	No	Yes	Yes	Yes	2.3	1.7	regular	no	no	severe
52	female	55	25.55	Yes	Yes	Yes	Yes	Yes	3.5	1.7	irregular	no	yes	mild
53	male	57	23.84	No	Yes	No	No	Yes	4.2	1.3	irregular	no	no	severe
54	male	62	24.68	Yes	Yes	No	Yes	No	3	1.7	irregular	yes	no	occlusive
55	male	55	23.37	Yes	Yes	Yes	Yes	Yes	3.7	1.4	irregular	no	no	moderate
56	male	65	21.4	No	No	Yes	Yes	Yes	3.6	1.5	irregular	yes	yes	moderate
57	female	57	22.39	Yes	Yes	Yes	No	No	2.6	1.4	irregular	no	yes	severe
58	male	65	24.37	No	Yes	No	Yes	No	3.5	1.5	irregular	no	no	mild
59	male	59	25.94	Yes	Yes	Yes	No	No	2.8	1.4	irregular	no	yes	severe
60	male	62	26.78	Yes	Yes	Yes	No	No	4.2	2.4	irregular	yes	yes	moderate
61	male	59	25.83	Yes	No	No	Yes	Yes	3.2	0.9	irregular	yes	yes	moderate
62	female	59	23.71	Yes	Yes	Yes	Yes	Yes	4.3	0.7	regular	no	no	occlusive

## Sheet: Stable
Num	Gender	Age	BMI (kg/m2）	Smoking history	History of hypertension	History of hyperglycemia	History of hyperlipidemia	History of coronary heart disease	Plaque thickness (mm)	IMT (mm)	Surface characteristics	Calcified nodules	Low echo area	Degree of carotid stenosis
1	male	61	25.92	No	Yes	Yes	No	Yes	1.2	0.9	regular	yes	yes	moderate
2	male	61	26.92	Yes	Yes	No	No	Yes	1.2	1.2	regular	yes	yes	moderate
3	male	59	26.39	No	Yes	Yes	Yes	Yes	1.7	1.2	regular	yes	no	mild
4	male	60	24.1	Yes	No	Yes	Yes	No	1.9	1.2	irregular	no	no	moderate
5	male	61	28.75	Yes	Yes	Yes	No	No	1.9	1.7	irregular	no	yes	moderate
6	male	57	22.37	No	Yes	Yes	No	Yes	2.5	1.2	regular	no	no	mild
7	female	58	26.41	No	No	Yes	Yes	Yes	2.4	1.8	regular	yes	no	mild
8	female	55	25.74	Yes	Yes	Yes	Yes	No	2.6	1.1	regular	yes	no	mild
9	male	61	26.68	No	Yes	Yes	Yes	No	3.4	1.7	irregular	yes	no	mild
10	female	59	23.93	No	Yes	Yes	Yes	No	3	1.1	regular	no	no	mild
11	male	59	31.37	Yes	No	No	Yes	No	1.1	1.4	irregular	yes	no	mild
12	male	51	28.52	Yes	Yes	No	No	No	0.3	1.7	irregular	yes	no	mild
13	male	51	21.11	Yes	No	Yes	No	No	2.8	1.2	regular	yes	yes	moderate
14	female	56	26.71	No	Yes	No	Yes	No	0.6	1.2	regular	yes	no	mild
15	male	57	25.86	Yes	Yes	No	Yes	No	2.1	2.2	regular	yes	no	moderate
16	male	53	25.65	Yes	Yes	Yes	Yes	Yes	2.1	1.7	regular	yes	yes	mild
17	male	62	21.1	Yes	Yes	Yes	No	Yes	3.8	1.2	regular	yes	no	moderate
18	male	64	23.7	No	No	No	No	No	2	1.6	regular	yes	no	mild
19	female	58	25.59	No	Yes	No	No	No	1.7	1.2	regular	no	no	mild
20	male	57	26.01	Yes	No	No	No	No	2.2	1.6	regular	yes	no	mild
21	female	62	27.39	Yes	Yes	Yes	No	No	2.2	1.9	regular	yes	no	severe
22	male	59	19.46	No	Yes	No	Yes	No	2.1	0.7	regular	yes	no	moderate
23	female	63	28.54	Yes	Yes	Yes	Yes	No	1.6	1.8	regular	yes	no	moderate
24	female	63	23.11	Yes	No	No	No	No	1.1	1.9	regular	yes	no	mild
25	female	62	28.27	Yes	No	Yes	No	Yes	2.3	1.3	regular	yes	no	mild
26	male	60	27.55	Yes	Yes	No	No	No	1	2	regular	yes	yes	mild
27	male	62	26.65	No	Yes	No	No	Yes	1.3	1.4	regular	yes	no	mild
28	male	62	27.05	Yes	No	Yes	Yes	Yes	3.1	0.8	irregular	no	yes	moderate
29	male	62	25.08	Yes	Yes	Yes	Yes	No	1.7	0.4	regular	yes	yes	mild
30	male	63	24.7	No	Yes	No	Yes	Yes	2	1.2	regular	yes	yes	mild
31	female	59	26.45	Yes	Yes	No	Yes	Yes	2.8	1.6	regular	yes	no	mild
32	female	58	29.22	Yes	Yes	Yes	Yes	No	1.8	1.5	regular	no	yes	mild
33	male	50	31.94	Yes	Yes	No	Yes	Yes	2.9	1.5	irregular	yes	no	mild
34	female	57	28.31	Yes	Yes	Yes	Yes	Yes	1.8	1.1	regular	yes	no	mild
35	female	51	22.07	Yes	Yes	Yes	Yes	No	2.8	1.4	irregular	no	no	mild
36	female	60	28.32	Yes	No	Yes	Yes	No	2.5	0.7	regular	yes	yes	mild
37	male	52	26.93	Yes	No	Yes	Yes	No	1.9	1	regular	yes	no	mild
38	male	56	24.97	Yes	Yes	Yes	Yes	No	1.4	1	irregular	yes	no	moderate
